# Supplementary material
Source: Springer Nature journal article supplement (https://www.springermedizin.de/resource/supplementary/12985_2011_1223_MOESM2_ESM.pdf/9609348)

A

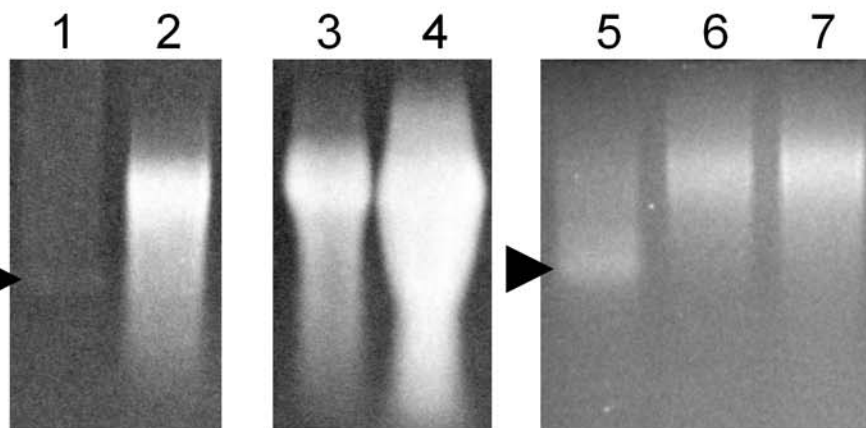

B

2601  
 AGGCTCTCTCAAT **TATCTGTT** TGTTTTTACTGGAAGCGCT

C

|              | PTH signal                 |                                  |
|--------------|----------------------------|----------------------------------|
|              | conserved seq.             | T-rich seq.                      |
| original seq | TATCTGTT                   | TGTTTTT                          |
| del PTH5     | TAC <b>CCT</b> A <b>TT</b> | <b>CGT</b> <b>G</b> T <b>TTC</b> |
| del PTH2     | TAC <b>CCT</b> A <b>TT</b> | TGTTTTT                          |

D

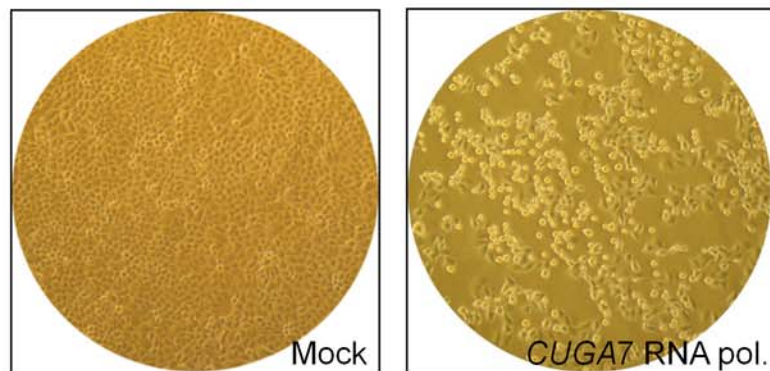

Supplement: MOESM2 [file 9609348]
